# Supplementary material
Source: PubMed Central journal article supplement (PMC7963759)
Supplement: 17-00634.pdf [file 17-00634.pdf]

**On-line Table: Survey questions and responses**

| Question                                                                                         | Response                           | Frequency <sup>a</sup> |
|--------------------------------------------------------------------------------------------------|------------------------------------|------------------------|
| <b>Triage</b>                                                                                    |                                    |                        |
| Is there an acute response team of nonphysicians which responds to stroke alerts?                | Yes                                | 53% (16/30)            |
|                                                                                                  | No                                 | 47% (14/30)            |
| What noninvasive imaging do patients undergo before thrombectomy?                                | NCCT                               | 3% (1/30)              |
|                                                                                                  | NCCT and CTA                       | 30% (9/30)             |
|                                                                                                  | NCCT, CTA, and CTP                 | 57% (17/30)            |
|                                                                                                  | NCCT, MRI, and MRA                 | 3% (1/30)              |
|                                                                                                  | MRI, MRA, and MRP                  | 7% (2/30)              |
| <b>Team activation</b>                                                                           |                                    |                        |
| When is the NI team contacted relative to noninvasive imaging?                                   | Preacquisition                     | 86% (25/29)            |
|                                                                                                  | Postacquisition, preinterpretation | 3% (1/29)              |
|                                                                                                  | Postinterpretation                 | 10% (3/29)             |
| To whom is initial contact directed?                                                             | NI physician                       | 93% (28/30)            |
|                                                                                                  | NI team                            | 7% (2/30)              |
| How does the NI physician activate the remainder of NI team?                                     | Direct contact                     | 63% (19/30)            |
|                                                                                                  | Hospital operator                  | 23% (7/30)             |
|                                                                                                  | Other designee                     | 13% (4/30)             |
| When is the full NI team activated?                                                              | Before decision to treat           | 59% (17/29)            |
|                                                                                                  | After decision to treat            | 41% (12/29)            |
| What is the required response time for NI nurses?                                                | 20 minutes                         | 3% (1/30)              |
|                                                                                                  | 30 minutes                         | 50% (15/30)            |
|                                                                                                  | 45 minutes                         | 23% (7/30)             |
|                                                                                                  | 60 minutes                         | 20% (6/30)             |
|                                                                                                  | None                               | 3% (1/30)              |
| What is the required response time for NI technologists?                                         | 20 minutes                         | 0% (0/30)              |
|                                                                                                  | 30 minutes                         | 53% (16/30)            |
|                                                                                                  | 45 minutes                         | 23% (7/30)             |
|                                                                                                  | 60 minutes                         | 20% (6/30)             |
|                                                                                                  | None                               | 3% (1/30)              |
| <b>Transport</b>                                                                                 |                                    |                        |
| Who is involved in patient transport from the ED to the neuroangiography suite?                  | ED and/or neurology                | 87% (26/30)            |
|                                                                                                  | NI                                 | 20% (6/30)             |
|                                                                                                  | Anesthesiology                     | 7% (2/30)              |
| Is patient transport to the neuroangiography suite before NI team arrival permitted?             | Yes                                | 43% (12/28)            |
|                                                                                                  | No                                 | 57% (16/28)            |
| <b>Case setup</b>                                                                                |                                    |                        |
| When and by whom is the procedural tray set up?                                                  | Upon arrival, by NI team           | 90% (27/30)            |
|                                                                                                  | In advance, by NI team (dry tray)  | 7% (2/30)              |
|                                                                                                  | In advance, by in-house designee   | 3% (1/30)              |
| Is the procedural tray opened the same one used for routine diagnostic angiography? <sup>b</sup> | Yes                                | 90% (27/30)            |
|                                                                                                  | No                                 | 10% (3/30)             |
| Are thrombectomy supplies stored in a centralized location (eg, stroke cart)?                    | Yes                                | 54% (15/28)            |
|                                                                                                  | No                                 | 46% (13/28)            |
| Is a power injector left preloaded with contrast in anticipation of use?                         | Yes                                | 0% (0/30)              |
|                                                                                                  | No                                 | 100% (30/30)           |
| Is a power injector used for angiographic runs?                                                  | Yes                                | 43% (13/30)            |
|                                                                                                  | No                                 | 54% (16/30)            |
|                                                                                                  | Variable                           | 3% (1/30)              |
| <b>Anesthesia</b>                                                                                |                                    |                        |
| Does the anesthesiology service routinely participate in thrombectomies?                         | Yes                                | 67% (20/30)            |
|                                                                                                  | No                                 | 27% (8/30)             |
|                                                                                                  | Variable                           | 7% (2/30)              |
| What type of anesthesia is typically administered?                                               | None (local anesthesia only)       | 4% (1/28)              |
|                                                                                                  | Sedation                           | 43% (12/28)            |
|                                                                                                  | General                            | 21% (6/28)             |
|                                                                                                  | Variable                           | 32% (9/28)             |

**Note:**—ED indicates emergency department; MRP, MR perfusion.

<sup>a</sup> Differences in the number of responding institutions indicate non-responses to survey questions.

<sup>b</sup> Regardless of the type of tray opened, additional supplies may be added as needed.
